# Supplementary material for: Prognostic value and immune landscapes of disulfidptosis‑related lncRNAs in bladder cancer
Source: PubMed Central journal article supplement — Mol Clin Oncol. 2024 Dec 13;22(2):19. doi: 10.3892/mco.2024.2814 (PMC11706340; doi:10.3892/mco.2024.2814), 2024-12-13
Supplement: Supplementary_Data2.pdf [file Supplementary_Data2.pdf]

Table SI. Primers for reverse transcription quantitative experiments with 8 disulfidptosis-related long non-coding RNAs.

| Gene name  | Primer sequence (5'-3')                                     |
|------------|-------------------------------------------------------------|
| AL390719.2 | F: ATGGGATAGGGAAGGCAGGT<br>R: CAGGGTCCTTCCTGTCACAC          |
| ASMTL-AS1  | F: TTGTGGACTTGTCTGTCTGG<br>R: CTGACGGACGTATCTCGTTTT         |
| AL031058.1 | F: TCCCGTATACCTACACCTCTAT<br>R: AATCTTAGGCATCAGCAACA        |
| LINC02438  | F: CCGCTGTGTGGAAAAGAGAATGTG<br>R: CAAGGCACTATCACATTTGCCTGTA |
| LINC01788  | F: ACCTAAGGGCTGATGGTGGG<br>R: GTCCAGAGCTGACCTGTTCTAC        |
| AC022613.2 | F: AAGCCACAACTGACTGCATCT<br>R: CATGATTCTGTGCGTCGGCA         |
| RBMS3-AS3  | F: GGAACCTGAACCTGAAGAACTCAA<br>R: AGCTCTTGTGTGGGGTAGATG     |
| AL122035.1 | F: GGCAAACAACCTCCTTGAGC<br>R: TGTGTCTCTTACCGCACTGG          |

F, forward; R, reverse.

Table SII. A total of 14 differentially expressed disulfidptosis-related lncRNAs.

| lncRNA     | Hazard ratio (95% confidence interval) | P-value |
|------------|----------------------------------------|---------|
| AL390719.2 | 0.839 (0.747-0.942)                    | 0.003   |
| ASMTL-AS1  | 0.776 (0.643-0.936)                    | 0.008   |
| AL031058.1 | 1.247 (1.095-1.421)                    | 0.001   |
| AC010487.1 | 0.819 (0.705-0.953)                    | 0.009   |
| LINC02223  | 22.786 (2.664-194.899)                 | 0.004   |
| LINC02438  | 2.042 (1.382-3.0174)                   | 0.000   |
| DEPDC1-AS1 | 2.499 (1.259-4.961)                    | 0.009   |
| LINC01788  | 2.358 (1.363-4.080)                    | 0.002   |
| AC022613.2 | 1.853 (1.256-2.733)                    | 0.002   |
| RBMS3-AS3  | 2.236 (1.443-3.466)                    | 0.000   |
| AL122035.1 | 1.771 (1.243-2.523)                    | 0.002   |
| AL590428.1 | 2.735 (1.569-4.770)                    | 0.000   |
| LINC02817  | 5.627 (1.856-17.059)                   | 0.002   |
| AC087564.1 | 14.961 (1.986-112.719)                 | 0.009   |

lncRNA, long non-coding RNA.

Table SIII. A total of 8 differentially expressed disulfidptosis-related lncRNAs.

| lncRNA     | Coefficient |
|------------|-------------|
| AL390719.2 | -0.003727   |
| ASMTL-AS1  | -0.126979   |
| AL031058.1 | 0.1324342   |
| LINC02438  | 0.3540896   |
| LINC01788  | 0.1858756   |
| AC022613.2 | 0.1228996   |
| RBMS3-AS3  | 0.1901772   |
| AL122035.1 | 0.2711116   |

lncRNA, long non-coding RNA.

Table SIV. Gene set enrichment analysis pathways for different risk groups.

| Pathways                                                                               | Group     |
|----------------------------------------------------------------------------------------|-----------|
| c2.cp.kegg.v7.4.symbols.gmt                                                            |           |
| KEGG focal adhesion                                                                    | High risk |
| KEGG WNT signaling pathway                                                             | High risk |
| KEGG regulation of actin cytoskeleton                                                  | High risk |
| KEGG cell cycle                                                                        | High risk |
| KEGG bladder cancer                                                                    | High risk |
| KEGG linoleic_acid_metabolism                                                          | Low risk  |
| KEGG alpha_linolenic_acid_metabolism                                                   | Low risk  |
| KEGG metabolism_of_xenobiotics_by_cytochrome_P450                                      | Low risk  |
| c2.cp.wikipathways.v7.4.symbols.gmt                                                    |           |
| WP WNT signaling                                                                       | High risk |
| WP regulation of actin cytoskeleton                                                    | High risk |
| WP focal adhesionpi3kaktmtorsignaling pathway                                          | High risk |
| WP cell cycle                                                                          | High risk |
| WP WNT signaling pathway and pluripotency                                              | High risk |
| WP tamoxifen_metabolism                                                                | Low risk  |
| WP estrogen_metabolism                                                                 | Low risk  |
| WP codeine_and_morphine_metabolism                                                     | Low risk  |
| WP eicosanoid metabolism via cytochrome P450 monooxygenases cyp pathway                | Low risk  |
| c5.go.bp.v7.4.symbols.gmt                                                              |           |
| GOBP focal adhesion assembly                                                           | High risk |
| GOBP regulation of cell cycle phase transition                                         | High risk |
| GOBP WNT signaling pathway calcium modulating pathway                                  | High risk |
| GOBP regulation of actin filament-based process                                        | High risk |
| GOBP regulation of cell cycle                                                          | High risk |
| KEGG, Kyoto Encyclopedia of Genes and Genomes; GOBP, Gene Ontology Biological Process. |           |

Table SV. Antineoplastic drug sensitivity information (sensitive group: High-risk).

| Target pathway       | Low-risk group            | High-risk group           | P-value |
|----------------------|---------------------------|---------------------------|---------|
|                      | IC <sub>50</sub> (25-75%) | IC <sub>50</sub> (25-75%) |         |
| Apoptosis regulation |                           |                           |         |
| AZD5582              | 12.62 (6.65-23.8)         | 7.26 (2.41-18.66)         | 0.00    |
| LCL161               | 171.54 (117.44-254.41)    | 111.94 (70.03-176.85)     | 0.00    |
| MIM1                 | 49.34 (38.96-68.96)       | 43.51 (30.65-63.26)       | 0.01    |
| Obatoclox.Mesylate   | 5.04 (2.75-10.58)         | 3.08 (1.54-6.2)           | 0.00    |
| UMI.77               | 14.6 (10.56-21.83)        | 10.89 (7.07-20.41)        | 0.00    |
| Cell cycle           |                           |                           |         |
| BI.2536              | 1.49 (1.03-2.05)          | 1.25 (0.8-1.88)           | 0.01    |
| CDK9_5576            | 0.72 (0.41-1.31)          | 0.5 (0.3-1.14)            | 0.03    |
| Chromatin other      |                           |                           |         |
| AZD5153              | 6.72 (2.22-24.38)         | 3.71 (1.34-8.09)          | 0.00    |
| LBET.762             | 37.96 (17.55-97.21)       | 18.66 (9.42-40.53)        | 0.00    |
| LBRD9                | 85.6 (56.95-125.95)       | 75.91 (49.13-102.45)      | 0.01    |
| JQ1                  | 13.5 (9.73-20.49)         | 10.47 (5.71-14.73)        | 0.00    |
| OTX015               | 21.96 (5.99-57.28)        | 7.02 (2.91-19.04)         | 0.00    |
| DNA replication      |                           |                           |         |
| Camptothecin         | 0.11 (0.04-0.47)          | 0.06 (0.02-0.19)          | 0.00    |
| Irinotecan           | 19.22 (4.63-76.59)        | 7.12 (2.05-30.61)         | 0.00    |
| Mitoxantrone         | 2.04 (0.7-6.81)           | 1.47 (0.54-4.11)          | 0.02    |
| Pyridostatin         | 30.28 (17.29-84)          | 17.84 (10.07-35.14)       | 0.00    |
| Teniposide           | 1.98 (0.61-7.18)          | 1.2 (0.43-4.37)           | 0.02    |
| Topotecan            | 1.33 (0.47-4.6)           | 0.81 (0.27-2.93)          | 0.00    |
| EGFR signaling       |                           |                           |         |
| AZD3759              | 15.04 (10.68-23.84)       | 11.83 (7.46-22.62)        | 0.01    |
| Osimertinib          | 8.04 (4.7-13.4)           | 4.73 (2.34-8.24)          | 0.00    |
| Sapitinib            | 66.25 (43.77-107.96)      | 42.86 (16.6-95.84)        | 0.00    |
| ERK MAPK signaling   |                           |                           |         |
| Trametinib           | 2.08 (0.61-7.31)          | 1.27 (0.48-4.04)          | 0.00    |
| Genome integrity     |                           |                           |         |
| KU.55933             | 85.19 (70.15-109.07)      | 69.8 (54.07-92.64)        | 0.00    |
| Niraparib            | 94.36 (47.29-191.56)      | 54.14 (25.15-107.49)      | 0.00    |
| NU7441               | 15.28 (13.22-17.12)       | 12.82 (10.67-15.26)       | 0.00    |
| Olaparib             | 86.77 (54.98-147.09)      | 54.97 (34.1-93.28)        | 0.00    |
| Talazoparib          | 41.57 (13.01-124.58)      | 15.04 (3.97-49.85)        | 0.00    |
| VE.822               | 30.11 (16.39-71.19)       | 27.79 (10.86-51.62)       | 0.02    |
| IGF1R signaling      |                           |                           |         |
| BMS.754807           | 1.72 (1.14-2.44)          | 1.44 (0.71-2.09)          | 0.01    |
| IGF1R_3801           | 8.85 (3.25-29.4)          | 3.35 (1.34-10.15)         | 0.00    |
| Metabolism           |                           |                           |         |
| AGI.5198             | 108.44 (86.55-139.89)     | 101.45 (77.86-123.46)     | 0.01    |
| GSK2606414           | 53.37 (33.51-85.13)       | 32.57 (19.59-50.85)       | 0.00    |
| Mitosis              |                           |                           |         |
| Alisertib            | 16.69 (2.09-52.53)        | 2.81 (0.38-16.88)         | 0.00    |
| Docetaxel_1819       | 0.14 (0.02-1.37)          | 0.07 (0.02-0.35)          | 0.01    |
| Paclitaxel           | 0.07 (0.03-0.14)          | 0.05 (0.03-0.12)          | 0.05    |
| Tozasertib           | 20.55 (16.47-26.34)       | 18.27 (12.51-24.38)       | 0.00    |
| Vinorelbine          | 0.05 (0.02-0.22)          | 0.03 (0.02-0.09)          | 0.02    |
| ZM447439             | 20.36 (16.89-24.89)       | 17.36 (14.21-22.39)       | 0.00    |
| Other                |                           |                           |         |

|                                   |                        |                      |      |
|-----------------------------------|------------------------|----------------------|------|
| Dactinomycin_1811                 | 0.1 (0.03-0.31)        | 0.06 (0.03-0.15)     | 0.01 |
| X5.Fluorouracil                   | 118.25 (42.64-597.63)  | 58.1 (17.6-188.61)   | 0.00 |
| YK.4.279                          | 12.34 (6.3-23.53)      | 8.08 (3.74-16.2)     | 0.00 |
| Other, kinases                    |                        |                      |      |
| AZ960                             | 8.46 (5.34-18.4)       | 6 (3.12-12.17)       | 0.00 |
| AZD5363                           | 22.6 (15.46-33.01)     | 17.23 (9.84-26.75)   | 0.00 |
| Entospletinib                     | 47.78 (33.62-73.7)     | 35.68 (22.32-52.26)  | 0.00 |
| JAK_8517                          | 26.81 (13.92-48.27)    | 16.28 (8.6-33.81)    | 0.00 |
| Ruxolitinib                       | 149.32 (109.04-195.77) | 113.38 (79.33-158.3) | 0.00 |
| PI3K MTOR signaling               |                        |                      |      |
| Alpelisib                         | 52.03 (30.93-88.58)    | 28.11 (13.95-50.33)  | 0.00 |
| AMG.319                           | 171.78 (108.81-267.69) | 97.61 (60.12-158.33) | 0.00 |
| AZD2014                           | 9.15 (4.08-23.3)       | 5.75 (2.8-11.16)     | 0.00 |
| AZD8186                           | 36.58 (15.89-93.08)    | 15.56 (6.54-38.35)   | 0.00 |
| Buparlisib                        | 2.9 (2.12-3.99)        | 2.53 (1.91-3.24)     | 0.01 |
| Pictilisib                        | 5.77 (2.67-11.21)      | 3.07 (1.68-6.02)     | 0.00 |
| Taselisib                         | 14.77 (4.09-70.9)      | 3.1 (0.68-11.56)     | 0.00 |
| Uprosertib_1553                   | 23.97 (5.59-140.97)    | 7.18 (2.16-23.05)    | 0.00 |
| Protein stability and degradation |                        |                      |      |
| Luminespib                        | 0.17 (0.06-0.61)       | 0.06 (0.02-0.17)     | 0.00 |
| RTK signaling                     |                        |                      |      |
| Foretinib                         | 3.01 (2.01-4.44)       | 2.57 (1.56-4.07)     | 0.01 |
| Savolitinib                       | 17.73 (10.2-29.08)     | 10.14 (6.52-16.25)   | 0.00 |
| Staurosporine                     | 0.07 (0.04-0.21)       | 0.03 (0.01-0.08)     | 0.00 |
| Unclassified                      |                        |                      |      |
| Acetalax                          | 156.47 (83.52-272.69)  | 104.1 (39.96-238.52) | 0.00 |
| WNT signaling                     |                        |                      |      |
| Carmustine                        | 493.32 (351.27-670.93) | 415.26 (302.8-567.6) | 0.01 |
| XAV939                            | 86.69 (61.97-120.26)   | 75.62 (53.6-101.73)  | 0.01 |

---

Table SVI. Antineoplastic drug sensitivity information (sensitive group: Low-risk).

| Target pathways               | Low-risk group            | High-risk group           | P-value |
|-------------------------------|---------------------------|---------------------------|---------|
|                               | IC <sub>50</sub> (25-75%) | IC <sub>50</sub> (25-75%) |         |
| ABL signaling                 |                           |                           |         |
| Nilotinib                     | 27.84 (9.18-61.13)        | 61.73 (24.41-132.81)      | 0.00    |
| Apoptosis regulation          |                           |                           |         |
| ABT737                        | 10.15 (1.04-36.97)        | 15.55 (4.92-37.85)        | 0.01    |
| AZD5991                       | 69.7 (17.51-198.7)        | 75.38 (27.97-246.47)      | 0.04    |
| Navitoclax                    | 5.37 (0.35-42.76)         | 15.3 (3.95-62.87)         | 0.00    |
| Sabutoclax                    | 0.49 (0.32-1.01)          | 0.8 (0.51-1.44)           | 0.00    |
| Sepantronium.bromide          | 0.01 (0-0.02)             | 0.02 (0.01-0.05)          | 0.00    |
| Venetoclax                    | 8.73 (3.39-15.89)         | 12.59 (6.37-19.48)        | 0.00    |
| WEHI.539                      | 30.48 (14.23-64.53)       | 41.47 (22.86-74.11)       | 0.00    |
| Cell cycle                    |                           |                           |         |
| AZD7762                       | 1.02 (0.46-1.83)          | 1.29 (0.67-2.24)          | 0.01    |
| CDK9_5038                     | 0.06 (0.04-0.15)          | 0.09 (0.04-0.27)          | 0.03    |
| MK.1775                       | 1.4 (0.9-2.62)            | 2.05 (1.12-3.48)          | 0.00    |
| Palbociclib                   | 35.04 (18.41-72.66)       | 45.79 (26.64-71.69)       | 0.02    |
| Wee1.Inhibitor                | 4.99 (2.73-12.61)         | 10.79 (4.77-23.58)        | 0.00    |
| Chromatin histone acetylation |                           |                           |         |
| Entinostat                    | 9.04 (1.75-36.41)         | 18.02 (5.56-65.34)        | 0.00    |
| OF.1                          | 53.78 (28.06-102.64)      | 68.98 (37.13-113.06)      | 0.02    |
| PCI.34051                     | 67.64 (41.78-117.95)      | 109.36 (60.45-201.91)     | 0.00    |
| Vorinostat                    | 3.67 (0.79-13.41)         | 9.8 (3.25-41.56)          | 0.00    |
| Chromatin histone methylation |                           |                           |         |
| EPZ004777                     | 151.58 (67.64-289.16)     | 242.39 (113.53-455.49)    | 0.00    |
| EPZ5676                       | 229.35 (111.55-433.29)    | 353.66 (196.44-568.1)     | 0.00    |
| GSK343                        | 14.54 (9.79-22.42)        | 20.42 (14.13-28)          | 0.00    |
| Chromatin other               |                           |                           |         |
| PFI3                          | 182.75 (122.03-287.55)    | 217.77 (148.48-301.86)    | 0.03    |
| Cytoskeleton                  |                           |                           |         |
| BDP.00009066                  | 9.34 (5.97-13.74)         | 12 (8.81-17.41)           | 0.00    |
| PAK_5339                      | 9.72 (5.2-14.48)          | 14.73 (9.15-20.29)        | 0.00    |
| DNA replication               |                           |                           |         |
| Cyclophosphamide              | 160.55 (81.27-300.55)     | 231.24 (135.81-365.56)    | 0.00    |
| Epirubicin                    | 0.27 (0.17-0.51)          | 0.38 (0.22-0.76)          | 0.00    |
| Gemcitabine                   | 0.41 (0.12-1.01)          | 0.66 (0.24-2.14)          | 0.00    |
| Leflunomide                   | 122.1 (99.24-159.19)      | 159.47 (124.38-221.71)    | 0.00    |
| Nelarabine                    | 386.1 (183.02-685.25)     | 436.82 (281.36-760.79)    | 0.01    |
| Oxaliplatin_1806              | 143.92 (75.3-246.57)      | 175.41 (98.68-305.04)     | 0.04    |
| Temozolomide                  | 359.26 (193.6-662.76)     | 474.53 (293.25-707.63)    | 0.01    |
| EGFR signaling                |                           |                           |         |
| Lapatinib                     | 16.35 (7.86-31.15)        | 23.16 (8.97-61.1)         | 0.04    |
| ERK MAPK signaling            |                           |                           |         |
| Dabrafenib                    | 78.05 (38.57-141)         | 135.23 (83.32-201.55)     | 0.00    |
| ERK_2440                      | 10.51 (4.77-24.7)         | 15.13 (6.41-34.56)        | 0.01    |
| ERK_6604                      | 23.72 (11.53-48.48)       | 38.87 (19.58-68.62)       | 0.00    |
| KRAS.G12C.Inhibitor.12        | 52.41 (29.45-97.79)       | 93.58 (49.88-217.59)      | 0.00    |
| Ulixertinib_2047              | 6.28 (1.37-16.25)         | 17.07 (5.8-38.1)          | 0.00    |
| Genome integrity              |                           |                           |         |
| AZD6738                       | 5.73 (2.94-11.86)         | 10.71 (5.34-18.83)        | 0.00    |
| BIBR.1532                     | 117.76 (78.16-185.95)     | 153.92 (115.72-231.42)    | 0.00    |

|                                   |                        |                        |      |
|-----------------------------------|------------------------|------------------------|------|
| VE821                             | 48.38 (30.46-90.22)    | 73.76 (39.52-110.56)   | 0.00 |
| Hormone-related                   |                        |                        |      |
| Fulvestrant_1200                  | 16.91 (11.86-23.14)    | 19.78 (14.66-26.17)    | 0.00 |
| GDC0810                           | 130.86 (79.44-201.49)  | 146.75 (99.38-223.31)  | 0.03 |
| Tamoxifen                         | 32 (20.96-49.74)       | 36.96 (27.16-55.92)    | 0.02 |
| IGF1R signaling                   |                        |                        |      |
| GSK1904529A                       | 60.55 (35.79-107.4)    | 84.41 (48.47-147.02)   | 0.00 |
| Linsitinib                        | 34.85 (13.53-74.87)    | 70.77 (33.21-122.81)   | 0.00 |
| JNK and p38 signaling             |                        |                        |      |
| Doramapimod                       | 77.73 (62.24-110.48)   | 104.08 (74-143.05)     | 0.00 |
| Mitosis                           |                        |                        |      |
| Vincristine                       | 0.1 (0.04-0.31)        | 0.18 (0.07-0.73)       | 0.00 |
| Other                             |                        |                        |      |
| Cytarabine                        | 4.54 (1.79-10.24)      | 6.64 (2.91-15.61)      | 0.00 |
| Dactinomycin_1911                 | 0.01 (0-0.01)          | 0.01 (0-0.02)          | 0.00 |
| LY2109761                         | 152.04 (72.21-272.97)  | 207.68 (123.09-450.65) | 0.00 |
| Picolinici.acid                   | 155.83 (97.07-239.22)  | 187.16 (130.3-283.11)  | 0.00 |
| VSP34_8731                        | 9.79 (3.96-16.29)      | 11.89 (6.97-29.37)     | 0.00 |
| Zoledronate                       | 38.09 (23.51-62.37)    | 54.26 (31.63-85.42)    | 0.00 |
| Other, kinases                    |                        |                        |      |
| AZD1208                           | 167.88 (118.5-277.57)  | 209.84 (146.42-329.2)  | 0.00 |
| IRAK4_4710                        | 117 (43.91-232.03)     | 211.02 (112.11-351.43) | 0.00 |
| JAK1_8709                         | 58.15 (40.75-84.79)    | 66.71 (46.95-93.94)    | 0.04 |
| PRT062607                         | 22.39 (15.24-31.95)    | 29.42 (20.34-41.88)    | 0.00 |
| Sorafenib                         | 11.58 (4-22.08)        | 23.22 (11.93-45.43)    | 0.00 |
| p53 pathway                       |                        |                        |      |
| MIRA.1                            | 191.59 (110.75-353.34) | 270.33 (156.9-387.36)  | 0.00 |
| Nutlin.3a....                     | 77.15 (12.9-274.91)    | 223.8 (59.92-470.65)   | 0.00 |
| PI3K MTOR signaling               |                        |                        |      |
| AT13148                           | 27 (13.24-52.54)       | 52.72 (26.42-97.45)    | 0.00 |
| MK.2206                           | 17.47 (13.29-27.54)    | 22.17 (13.82-32.96)    | 0.02 |
| PF.4708671                        | 44.82 (35.1-55.68)     | 51.22 (41.65-62.4)     | 0.00 |
| Protein stability and degradation |                        |                        |      |
| ML323                             | 76.8 (43.94-128.03)    | 105.41 (63.47-171.52)  | 0.00 |
| P22077                            | 64.84 (27.76-137.2)    | 114.24 (58.6-236.65)   | 0.00 |
| RTK signaling                     |                        |                        |      |
| Axitinib                          | 20.06 (15.71-28.1)     | 22.85 (16.93-31.3)     | 0.02 |
| AZD4547                           | 13.95 (10.04-20.46)    | 19.19 (12.8-33.61)     | 0.00 |
| Cediranib                         | 7.75 (3.5-12.7)        | 10.77 (6.11-17.59)     | 0.00 |
| PD173074                          | 45.82 (15.5-91.01)     | 78.23 (34.47-183.73)   | 0.00 |
| SB505124                          | 9.39 (7.69-10.89)      | 10.07 (8.4-11.99)      | 0.01 |
| Unclassified                      |                        |                        |      |
| Elephantin                        | 15.63 (6.93-43.26)     | 41.55 (20.98-115.94)   | 0.00 |
| Gallibiscoquinazole               | 11.66 (8.38-16.93)     | 14.17 (10.29-20.93)    | 0.00 |
| Podophyllotoxin.bromide           | 0.35 (0.15-0.83)       | 0.72 (0.35-2.17)       | 0.00 |
| Sinularin                         | 31.91 (7.21-69.28)     | 64.23 (28.57-136.6)    | 0.00 |
| WNT signaling                     |                        |                        |      |
| MN.64                             | 101.75 (47.04-188.37)  | 133.48 (74.47-236.27)  | 0.00 |



Table SVII. Antineoplastic drug sensitivity information (no obviously sensitive group).

| Target pathway                | Low-risk group            | High-risk group           | P-value |
|-------------------------------|---------------------------|---------------------------|---------|
|                               | IC <sub>50</sub> (25-75%) | IC <sub>50</sub> (25-75%) |         |
| Cell cycle                    |                           |                           |         |
| AZD5438                       | 8.29 (4.14-17.23)         | 8.69 (4.55-18.99)         | 0.15    |
| Dinaciclib                    | 0.06 (0.04-0.12)          | 0.05 (0.03-0.1)           | 0.08    |
| MK.8776                       | 22.77 (13.22-39.77)       | 26.35 (13.04-44.58)       | 0.34    |
| Ribociclib                    | 46.39 (42.72-50.22)       | 46.76 (42.91-50.07)       | 0.49    |
| RO.3306                       | 15.16 (11.93-20.43)       | 15.85 (11.4-21.87)        | 0.70    |
| Chromatin histone methylation |                           |                           |         |
| GSK591                        | 85.67 (66.05-132.49)      | 98.76 (71.6-145.48)       | 0.22    |
| Chromatin other               |                           |                           |         |
| RVX.208                       | 112.46 (85.67-153.93)     | 114.95 (81.69-154.27)     | 0.50    |
| Cytoskeleton                  |                           |                           |         |
| GSK269962A                    | 18.51 (15.07-21.65)       | 18.44 (15.09-22.68)       | 0.63    |
| DNA replication               |                           |                           |         |
| Cisplatin                     | 26.64 (13.02-54.32)       | 20.33 (9.71-67.08)        | 0.62    |
| Fludarabine                   | 151.98 (77.15-264.48)     | 151.67 (96.4-328.35)      | 0.16    |
| Oxaliplatin_1089              | 45.55 (20.3-117.48)       | 35.19 (17.02-85.32)       | 0.08    |
| EGFR signaling                |                           |                           |         |
| Afatinib                      | 6.21 (3.56-9.83)          | 5.97 (3.15-12.31)         | 0.87    |
| Erlotinib                     | 14.5 (8.15-23.44)         | 12.44 (6.66-24.7)         | 0.38    |
| Gefitinib                     | 24.33 (7.79-51.86)        | 27.56 (12.04-63.4)        | 0.10    |
| ERK MAPK signaling            |                           |                           |         |
| PD0325901                     | 1.92 (0.98-3.58)          | 1.5 (0.87-3.31)           | 0.09    |
| PLX.4720                      | 82.92 (45.64-149.45)      | 85.44 (50.69-148.02)      | 0.50    |
| SCH772984                     | 17.22 (5.53-34.35)        | 13.22 (5.97-27.78)        | 0.17    |
| Selumetinib                   | 53.99 (31.03-118.43)      | 63.99 (34.22-134.65)      | 0.18    |
| Ulixertinib_1908              | 17.81 (8.81-29.49)        | 16.34 (8.85-25.91)        | 0.28    |
| VX.11e                        | 18.23 (7.19-39.55)        | 18.36 (9.86-29.67)        | 0.50    |
| Genome integrity              |                           |                           |         |
| Mirin                         | 1.36 (0.92-2.38)          | 1.66 (0.99-2.83)          | 0.13    |
| Telomerase.Inhibitor.IX       | 115.01 (75.56-177.85)     | 98.41 (68.63-169.91)      | 0.20    |
| Hormone-related               |                           |                           |         |
| Fulvestrant_1816              | 95.11 (64.38-129.59)      | 95.96 (66.42-133.01)      | 0.81    |
| IGF1R signaling               |                           |                           |         |
| BMS.536924                    | 8.4 (6.22-12.58)          | 8.36 (5.47-11.52)         | 0.16    |
| NVP.ADW742                    | 13.69 (9.46-23.67)        | 16.7 (11.13-25.54)        | 0.08    |
| Metabolism                    |                           |                           |         |
| AGL.6780                      | 58.05 (44.93-76.66)       | 59.13 (45.27-85.68)       | 0.80    |
| Daporinad                     | 0.01 (0-0.06)             | 0.01 (0-0.02)             | 0.12    |
| Mitosis                       |                           |                           |         |
| Docetaxel                     | 0.01 (0-0.02)             | 0.01 (0.01-0.02)          | 0.05    |
| Vinblastine                   | 0.02 (0.01-0.05)          | 0.02 (0.01-0.05)          | 0.76    |
| Other                         |                           |                           |         |
| BMS.345541                    | 29.11 (13.02-86.62)       | 26.88 (13.33-52.34)       | 0.18    |
| BPD.00008900                  | 87.57 (59.45-138.13)      | 96.69 (61.18-141.03)      | 0.55    |
| Eg5_9814                      | 0.05 (0.02-0.1)           | 0.04 (0.02-0.09)          | 0.07    |
| IAP_5620                      | 174.77 (113.86-247.85)    | 166.86 (88.96-283.76)     | 0.57    |
| Pevonedistat                  | 2.2 (0.82-5.05)           | 2.6 (0.66-6.08)           | 0.51    |
| TAF1_5496                     | 43.42 (24.44-78.09)       | 46.33 (26.42-82.92)       | 0.43    |
| Other, kinases                |                           |                           |         |
| Dasatinib                     | 5.35 (1.55-15.49)         | 4.98 (1.81-10.85)         | 0.69    |

|                                   |                        |                        |      |
|-----------------------------------|------------------------|------------------------|------|
| GSK2578215A                       | 126.82 (100.37-168.88) | 135.99 (104.66-189.69) | 0.12 |
| Ibrutinib                         | 94.14 (57.72-159.46)   | 80.23 (39.28-179.45)   | 0.12 |
| ULK1_4989                         | 9.02 (5.83-14.36)      | 9.13 (5.98-15.14)      | 0.63 |
| WZ4003                            | 42.97 (32.86-62.35)    | 40.57 (26.02-59.69)    | 0.19 |
| p53 pathway                       |                        |                        |      |
| PRIMA.1MET                        | 89.9 (58.83-149.05)    | 93.42 (52.36-173.9)    | 0.76 |
| PI3K MTOR signaling               |                        |                        |      |
| Afuresertib                       | 11.79 (7.91-18.17)     | 12.74 (8.51-20.84)     | 0.22 |
| AZD6482                           | 25.18 (21.03-30.21)    | 24.3 (19.6-29.28)      | 0.18 |
| AZD8055                           | 0.81 (0.75-0.9)        | 0.83 (0.75-0.93)       | 0.39 |
| CZC24832                          | 153.15 (109.14-230.54) | 162.24 (117.13-225.56) | 0.34 |
| Dactolisib                        | 0.2 (0.09-0.56)        | 0.18 (0.11-0.35)       | 0.39 |
| GNE.317                           | 1.84 (1.2-2.81)        | 1.65 (1.1-2.58)        | 0.19 |
| Ipatasertib                       | 32.13 (22.71-49)       | 31.83 (22.19-52.92)    | 0.71 |
| LJI308                            | 156.03 (106.58-222.88) | 157.67 (125.22-237.63) | 0.17 |
| OSI.027                           | 115.29 (60.99-198.14)  | 122.21 (73.29-199.8)   | 0.27 |
| Rapamycin                         | 0.12 (0.06-0.21)       | 0.1 (0.07-0.16)        | 0.13 |
| Uprosertib_2106                   | 16.74 (11-31.88)       | 16.05 (7.9-27.34)      | 0.13 |
| Protein stability and degradation |                        |                        |      |
| Bortezomib                        | 0.01 (0.01-0.01)       | 0.01 (0.01-0.01)       | 0.73 |
| MG.132                            | 0.2 (0.15-0.25)        | 0.18 (0.15-0.25)       | 0.68 |
| RTK signaling                     |                        |                        |      |
| AZD1332                           | 40.95 (26.22-72.36)    | 46.79 (30.15-76.67)    | 0.19 |
| Crizotinib                        | 23.59 (14.3-36.37)     | 26.01 (17.51-40.79)    | 0.09 |
| Unclassified                      |                        |                        |      |
| Dihydrorotenone                   | 2.5 (1.64-3.78)        | 2.4 (1.35-4)           | 0.52 |
| WNT signaling                     |                        |                        |      |
| AZ6102                            | 11.01 (8.17-15)        | 11.81 (8.14-16.49)     | 0.24 |
| IWP.2                             | 15.88 (11.15-21.8)     | 15.64 (11.71-20.82)    | 1.00 |
| LGK974                            | 55.24 (35.24-81.36)    | 52.19 (34.88-89.71)    | 0.84 |
| SB216763                          | 166.6 (117.71-280.1)   | 191.35 (130-258.09)    | 0.14 |
| WIKI4                             | 41.8 (27.77-60.02)     | 43.32 (33.35-58.32)    | 0.20 |
| Wnt.C59                           | 67.46 (53.33-82.34)    | 69.63 (51.42-89.55)    | 0.56 |

Table SVIII. Summary of antineoplastic drug target pathways.

| Target pathway                    | A: Number of high-risksensitive | B: Number of low-risk sensitive | C: Total quantity of drugs | A/C | B/C  |
|-----------------------------------|---------------------------------|---------------------------------|----------------------------|-----|------|
| ABL signaling                     | 0                               | 1                               | 1                          | 0%  | 100% |
| Apoptosis regulation              | 5                               | 7                               | 12                         | 42% | 58%  |
| Cell cycle                        | 2                               | 5                               | 12                         | 17% | 42%  |
| Chromatin histone acetylation     | 0                               | 4                               | 4                          | 0%  | 100% |
| Chromatin histone methylation     | 0                               | 3                               | 4                          | 0%  | 75%  |
| Chromatin other                   | 5                               | 1                               | 7                          | 71% | 14%  |
| Cytoskeleton                      | 0                               | 2                               | 3                          | 0%  | 67%  |
| DNA replication                   | 6                               | 7                               | 16                         | 38% | 44%  |
| EGFR signaling                    | 3                               | 1                               | 7                          | 43% | 14%  |
| ERK MAPK signaling                | 1                               | 5                               | 12                         | 8%  | 42%  |
| Genome integrity                  | 6                               | 3                               | 11                         | 55% | 27%  |
| Hormone-related                   | 0                               | 3                               | 4                          | 0%  | 75%  |
| IGF1R signaling                   | 2                               | 2                               | 6                          | 33% | 33%  |
| JNK and p38 signaling             | 0                               | 1                               | 1                          | 0%  | 100% |
| Metabolism                        | 2                               | 0                               | 4                          | 50% | 0%   |
| Mitosis                           | 6                               | 1                               | 9                          | 67% | 11%  |
| Other                             | 3                               | 6                               | 15                         | 20% | 40%  |
| Other, kinases                    | 5                               | 5                               | 15                         | 33% | 33%  |
| p53 pathways                      | 0                               | 2                               | 3                          | 0%  | 67%  |
| PI3K/MTOR signaling               | 8                               | 3                               | 22                         | 36% | 14%  |
| Protein stability and degradation | 1                               | 2                               | 5                          | 20% | 40%  |
| RTK signaling                     | 3                               | 5                               | 10                         | 30% | 50%  |
| Unclassified                      | 1                               | 4                               | 6                          | 17% | 67%  |
| WNT signaling                     | 2                               | 1                               | 9                          | 22% | 11%  |

Table SIX. Survival analysis from the Human Protein Atlas database.

| Gene   | Expression group | Number of patients | 5-year survival rate | P-value |
|--------|------------------|--------------------|----------------------|---------|
| SLC2A1 | High             | 83                 | 24%                  | <0.001  |
|        | Low              | 323                | 46%                  |         |
| SLC3A2 | High             | 114                | 26%                  | <0.001  |
|        | Low              | 292                | 47%                  |         |
| WASF2  | High             | 162                | 32%                  | 0.08    |
|        | Low              | 244                | 48%                  |         |
| NCKAP1 | High             | 136                | 32%                  | 0.04    |
|        | Low              | 270                | 46%                  |         |
| RAC1   | High             | 112                | 30%                  | 0.01    |
|        | Low              | 294                | 45%                  |         |
